# Supplementary material for: A qualitative study of the roles and responsibilities of academic and journalistic publishing in social and behavioral genomics
Source: Research Square preprint supplement (doi:10.21203/rs.3.rs-7255778/v1), 2025-08-08
Supplement: Supplementary file 1 [file d06dd92dce00b61366959da1.docx]

**MEDIA JOURNALISTS**

*Sample opening: Thank you for taking the time out of your busy schedule to speak with me. I look forward to learning from you. Just to give you some brief context, the project that I’m working aims to understand how different groups interact with and think about social and behavioral genomics research and/or its applications. Media journalists are just one of many groups that I’m talking to. I’m also talking to social and behavioral genomics researchers, academic journal editors, members of the DTC genetic testing industry, and members of the public. So, the idea really is to learn how these multiple perspectives think about social and behavioral genomics and its significance and impact.*

*As we discussed before, anything you say in this interview will not be attributed to you as a person. Your name and any identifying institutions or other identifying information will not be included in any publications or presentations. I would like to audio record this conversation for transcription purposes and data collection. Are you still comfortable having this conversation audio recorded?*

**Role in the Social and Behavioral Arena**

*This first section is about understanding your background, the work you do, and your experiences engaging with social and behavioral genomics.*

1. Tell me a bit about your beat: What topics do you cover?
2. Tell me about when you first heard about or became aware of social and behavioral genomics. What was your first story on this research about?
3. What, if at all, do you think is the role of journalists in social and behavioral genomics?
   1. What impact, if at all, do you see journalists having on the conduct or translation of social and behavioral genomics?

**Benefits**

1. I’d love for you to think about your articles on social and behavioral genomics or the articles of others for a moment.
   1. What do you consider to be the scientific impact of this research?
   2. What do you consider to be the societal impact of this research?
   3. Do you have any other thoughts about the benefits, scientific or otherwise, of this research?
      1. Another way to ask: What do you consider to be the significance of social and behavioral genomic research? Why?
      2. *Can add a prompt if they don’t mention benefits that they uniquely have to consider as journalists.*
   4. What about the people you interview or cover in your reporting? What do they consider to be the significance or the benefits of social and behavioral genomic research?
2. Who do you see being impacted by __name specific benefit____ and how?
3. Is there anything you think you personally can do, should do, or do already to amplify __name specific benefit____?
4. What about your colleagues or journalism as a whole? Do you think there is anything they could do better to amplify __name specific benefit_____? What is it? Why?
   1. What are things you think journalists could do to more helpfully convey the nature of social and behavioral genomic discoveries? Why?
   2. What kinds of activities would be useful in disseminating the research coming out of social and behavioral genomics? Why?
5. I’ve been asking you about journalists, but who else outside of journalism do you think could, should, or does already help to amplify __name specific benefit_____? How?
6. Have your views about the benefits of this research changed over time? If so, how…and why?

**Harms**

1. From your own reporting and the reporting of others, are there any impacts of social and behavioral genomic research that give you pause? What are they? Why do they concern you?
   1. Again, I know this is a big, hard question to be asked, but I’d love to hear what you think. Do you have any additional thoughts about the potential risks of this research?
      1. *Can add a prompt if they don’t mention risks that they uniquely have to consider as journalists.*
2. Who do you see being impacted by __name specific risk____ and how?
3. Is there anything you think you personally can do or should do to mitigate against __name specific risk____? What is it?
4. What about your colleagues or the field as a whole? Do you think there is anything they can do, should do, or do already to mitigate against __name specific risk_____? What is it? Why?
5. Who else besides journalists do you think could, should, or does already help to could or does help to mitigate against __name specific risk_____?
6. Have your views about the risks of this research changed over time? If so, how…and why?

**Cross-Stakeholder**

*I asked who you else besides journalists you think can help amplify the benefits or mitigate against the risks of social and behavioral genomics. I’d like to continue pulling at that thread and gather your perspectives on what you think others outside of your field understand and don’t understand about the work that you do. As part of this project, I am also interviewing social and behavioral genomic researchers, academic journal editors, members of the DTC direct-to-consumer genetic testing industry, and members of the public. I’d like to get a sense for how you are thinking about these other groups as it relates to the work that you do.*

1. Ok given that context, is there anything that immediately comes to mind that you’d like to talk about?
2. What do you think scientific researchers understand and not understand about your work?
3. What do you think academic or scientific journal editors understand and not understand about your work?
4. How about members of the genetic testing industry? What should they know about the work that journalists do?
5. How about the public? What should they know about the work that journalists do?
6. Are there any other groups or communities you can think of?

**Closing**

1. What is the purpose of scientific research/science?
2. I just have one more question: What keeps you going with the work you do?
3. Do you have anything you would like to add? What questions, if any, do you have about what we’ve spoken about today?

**JOURNAL EDITORS**

*Sample opening: Thank you for taking the time out of your busy schedule to speak with me. I look forward to learning from you. Just to give you some brief context, the project that I’m working aims to understand how different groups interact with and think about social and behavioral genomics research and/or its applications. Academic journal editors are just one of many groups that I’m talking to. I’m also talking to social and behavioral genomics researchers, media journalists, members of the DTC genetic testing industry, and members of the public. So, the idea really is to learn how these multiple perspectives think about social and behavioral genomics and its significance and impact.*

*As we discussed before, anything you say in this interview will not be attributed to you as a person. Your name and any identifying institutions or other identifying information will not be included in any publications or presentations. I would like to audio record this conversation for transcription purposes and data collection. Are you still comfortable having this conversation audio recorded?*

**Role in the Social/behavioral Arena**

*This first section is about getting to know you and understanding your background and the work you do.*

1. I’d like to start by learning more about you and your work. Tell me how you got into editing?
2. Tell me about when you first heard about/became aware of social and behavioral genomics. Was there a particular paper that you reviewed or read that introduced you to the field?
3. What, if at all, do you think is the role of academic journal editors/your role in the conduct and translation of social and behavioral genomics research?
   1. What impact, if at all, do you see journal editors having on the conduct or translation of social and behavioral genomics?

**Benefits**

1. Think of the last several social and behavioral genomics publications that you reviewed or read. It doesn’t have to be in the journal you are an editor of, it can be any journal.
   1. What do you consider to be the scientific impacts of social and behavioral genomics?
   2. What do you consider to be the societal impact of social and behavioral genomics?
   3. Do you have any other thoughts about the benefits, scientific or otherwise, of this research?
   4. What about the people submitting these papers to you for review? What do think they consider to be the significance or the benefits of social and behavioral genomic research?
2. Who do you see being impacted by __name specific benefit____ and how?
3. Is there anything you think you personally can do to amplify __name specific benefit____?
4. What about your colleagues or academic publishing as a whole? Do you think there is anything they could do better to amplify __name specific benefit_____?
5. I’ve been asking you about journal editors, but who else outside of the academic journal world do you think could, should, or does already help to amplify __name specific benefit_____? How?
6. Have your views about the benefits of this research changed over time? If so, how…and why?

**Harms**

1. From your own work as an editor or the work of others, are there any impacts of social and behavioral genomic research that give you pause? What are they? Why do they concern you?
   1. Do you have any additional thoughts about the potential risks of this research?
      1. *Can add a prompt if they don’t mention risks that they uniquely have to consider as journalists.*
2. Who do you see being impacted by __name specific risk____ and how?
3. Is there anything you think you personally can do or should do to mitigate against __name specific risk____? What is it?
4. What about your colleagues or academic publishing as a whole? Do you think there is anything they can do, should do, or do already to mitigate against __name specific risk_____? What is it? Why?
5. Who else besides journal editors do you think could, should, or does already help to could or does help to mitigate against __name specific risk_____?
6. Have your views about the risks of this research changed over time? If so, how…and why?

**Cross-Stakeholder**

*I asked who you else besides journal editors you think can help amplify the benefits or mitigate against the risks of social and behavioral genomics. I’d like to continue pulling at that thread. As part of this project, I am also interviewing social and behavioral genomic researchers, media journalists, members of the DTC direct-to-consumer genetic testing industry, educators, and members of the public. I’d like to get a sense for how you are thinking about these other groups as it relates to the work that you do.*

1. Ok given that context, is there anything that immediately comes to mind that you’d like to talk about?
2. What do you think scientific researchers understand and not understand about your work?
3. What do you think media journalists understand and not understand about your work?
4. How about members of the genetic testing industry? What should they know about the work that journal editors do?
5. How about the public? What should they know about the work that journal editors do?
6. Are there any other groups or communities you can think of?
7. Do you think any of these groups have responsibilities when it comes to social and behavioral genomics? If so, what are they?

**Closing**

1. What is the purpose of science?
2. I just have one more question: what keeps you going with the work you do?
3. Do you have anything you would like to add? What questions, if any, do you have about what we’ve spoken about today?
